# Supplementary material for: Construction of light-responsive phase chirality from an achiral macrogelator
Source: Royal Society of Chemistry journal article supplement (doi:10.1039/c8tc06363j), 2019-01-01
Supplement: c8tc06363j1.pdf [file c8tc06363j1.pdf]

## Supporting Information

### Construction of Light-Responsible Phase Chirality from Achiral Macrogelator

Yu-Jin Choi,<sup>1</sup> Won-Jin Yoon,<sup>1</sup> Minwook Park, Dong-Gue Kang, Geukcheon Bang, Jahyeon Koo, Seok-In Lim, Seohee Park, and Kwang-Un Jeong\*

Polymer Materials Fusion Research Center & Department of Polymer-Nano Science and Technology, Chonbuk National University, Jeonju 54896, Republic of Korea

\*E-mail: kujeong@jbnu.ac.kr

#### Synthetic procedures

**Compound 1:** To a stirred solution of 4-(2-(2-(2-((4'-(octyloxy)-[1,1'-biphenyl]-4-yl)oxy)ethoxy)ethoxy) ethoxy)bezoate (0.95 g, 1.64 mmol) in tetrahydrofuran and methanol (10 ml/ 8 ml) was added aqueous sodium hydroxide (ca. 10 M, 4.1 ml). The mixture was refluxed for 5 hours at 60 °C and then neutralized with an aqueous hydrochloric acid. The precipitate was filtered off and washed with water. The crude product was purified by re-precipitation with chloroform and ethanol and dried under vacuum to afford compound 1 as a yellow solid (Yield: 0.94g, 95 %). <sup>1</sup>H NMR, δH(400 MHz, CDCl<sub>3</sub>): 0.89 (3 H, t, CH<sub>3</sub>), 1.23-1.21 (10 H, m, CH<sub>2</sub>), 1.80 (2 H, m, CH<sub>2</sub>), 3.77 (4 H, t, OCH<sub>2</sub>), 3.89 (4 H, m, OCH<sub>2</sub>), 4.02 (2 H, t, OCH<sub>2</sub>), 4.20 (4 H, m, OCH<sub>2</sub>), 6.99 (6 H, m, ArH), 7.84 (4 H, q, ArH), 8.01 (2 H, d, ArH).

**Compound 2:** 1,4-phenylenediamine (1.868 g, 17.28 mmol), compound 1 (1.0 g, 1.73 mmol), and DPTS (4-(dimethylamino)pyridinium-4-toluenesulfonate, 0.254 g, 0.86 mmol) were added to a sealed round-bottomed flask containing a magnetic stirring bar in 50 mL, MC/THF solution and stirred at 0 °C for 30 min. DIPC (diisopropylcarbodiimide, 1.09 g, 8.64 mmol) was then dissolved into the mixture and the solution was stirred at 0 °C for 24 h. After reaction, 50 ml H<sub>2</sub>O was poured into the solution and then extracted with MC (3 × 30 ml). The crude product subjected to column chromatography (silica, MC/THF = 4:1 (v/v)) to remove double substitute bisamide. After chromatography, products were re-precipitated from MeOH and filtered off to obtain compound as yellow powder (Yield: 0.85 g, 74 %). <sup>1</sup>H NMR, δH(400 MHz, CDCl<sub>3</sub>): 0.89 (3 H, t, CH<sub>3</sub>), 1.23-1.21 (10 H, m, CH<sub>2</sub>), 1.80 (2 H, m, CH<sub>2</sub>), 3.62 (2 H, s, CH<sub>2</sub>), 3.77 (4 H, t, OCH<sub>2</sub>), 3.89 (4 H, m, OCH<sub>2</sub>), 4.02 (2 H, t, OCH<sub>2</sub>), 4.20 (4 H, m, OCH<sub>2</sub>), 6.68 (2 H, d, NH<sub>2</sub>), 6.99 (6 H, m, ArH), 7.36 (2 H, d, ArH), 7.57 (1 H, s, NH), 7.84 (4 H, q, ArH), 8.01 (2 H, d, ArH).

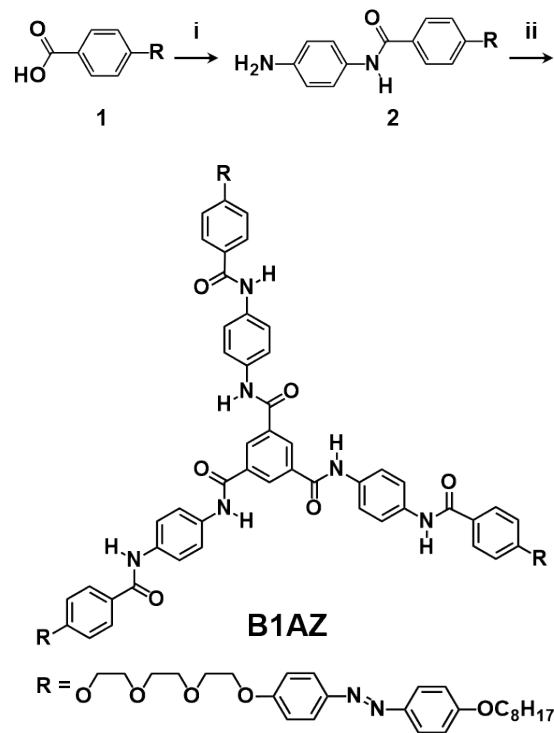

**Fig. S1** Synthetic procedures of achiral B1AZ macrogelator.

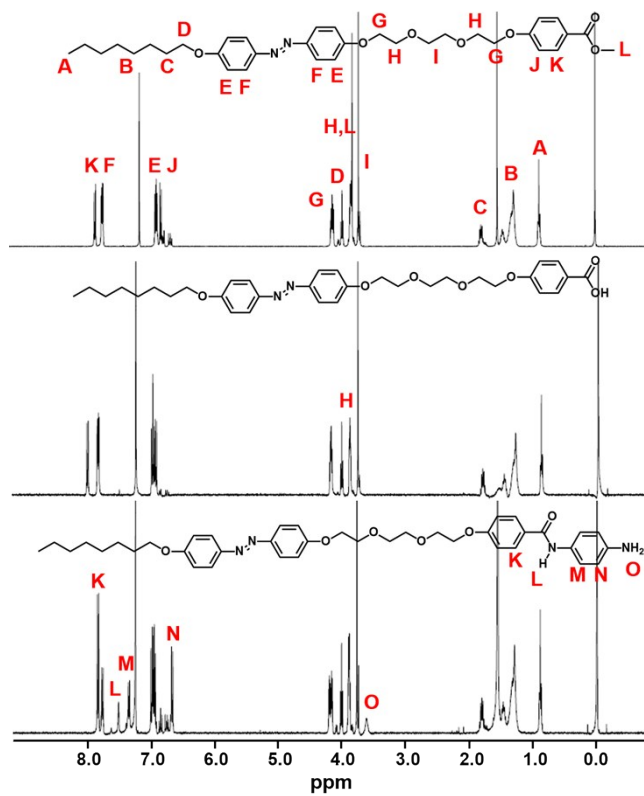

**Fig. S2**  $^1\text{H}$  NMR spectra of precursors of azobenzene molecular machine.

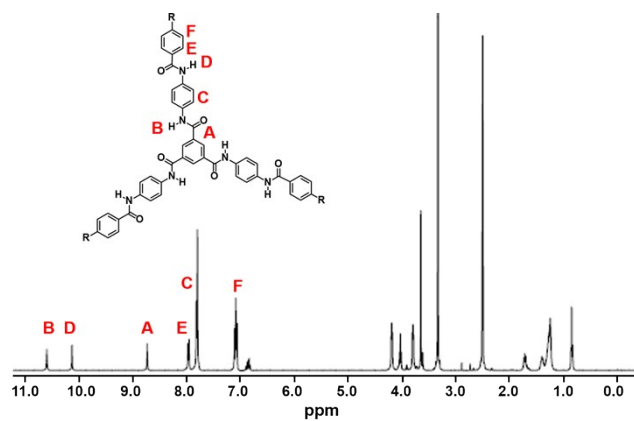

**Fig. S3**  $^1\text{H}$  NMR spectrum of achiral B1AZ macrogelator.

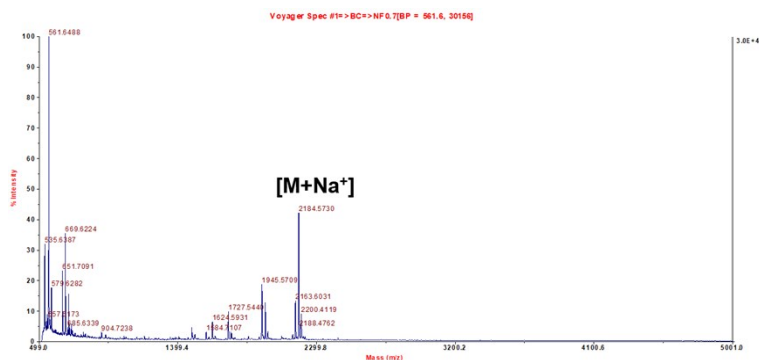

**Fig. S4** MALDI-ToF spectrum of achiral B1AZ macrogelator.

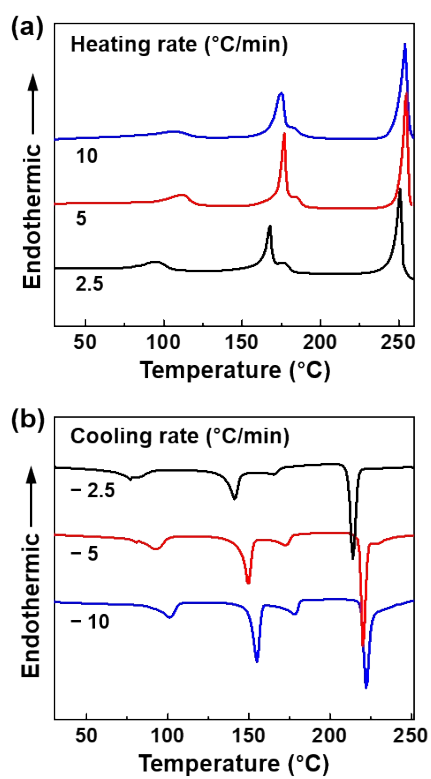

**Fig. S5** DSC thermograms upon (a) heating and (b) subsequent cooling process at the different scanning rates from 2.5 to 10 °C min<sup>-1</sup>.

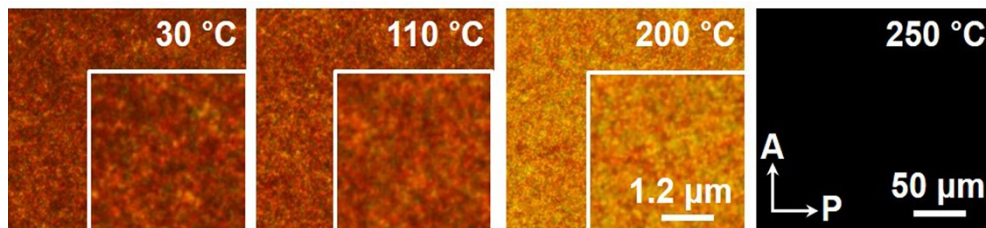

**Fig. S6** POM images with enlarged image (insert) at different temperatures taken during the 2.5 °C min<sup>-1</sup> cooling process.

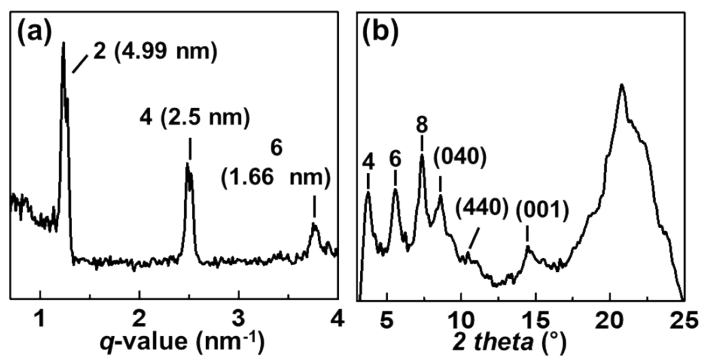

**Fig. S7** (a) 1D SAXS and (b) 1D WAXD patterns of B1AZ powder at room temperature.

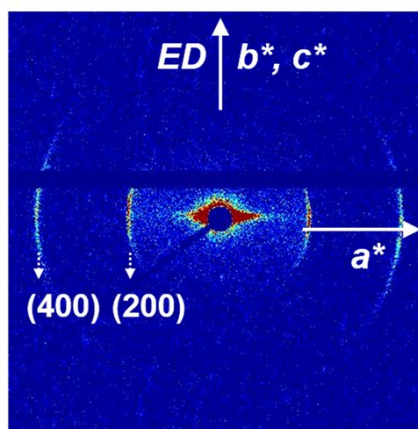

**Fig. S8** 2D SAXS pattern of the oriented B1AZ sample at room temperature.

**Table S1** Experimental and calculated crystallographic parameters of lamello-columnar phase of BIAZ.

| <i>(hkl)</i> | $2\theta$ (deg)   |                   | <i>d</i> -spacing (nm) |                   |
|--------------|-------------------|-------------------|------------------------|-------------------|
|              | Expt <sup>a</sup> | Calc <sup>b</sup> | Expt <sup>a</sup>      | Calc <sup>b</sup> |
| (040)        | 7.5               | 8.01              | 1.17                   | 1.10              |
| (070)        | 14.9              | 14.05             | 0.59                   | 0.63              |
| (001)        | 11.4              | 11.4              | 0.78                   | 0.78              |
| (002)        | 22.5              | 22.5              | 0.39                   | 0.39              |
| (200)        | 1.78              | 1.76              | 4.99                   | 5                 |
| (400)        | 3.5               | 3.53              | 2.52                   | 2.5               |
| (440)        | 8.4               | 8.76              | 1.05                   | 1.01              |
| (600)        | 5.5               | 5.3               | 1.6                    | 1.67              |
| (800)        | 7.7               | 7.4               | 1.14                   | 1.19              |
| (1600)       | 13.4              | 13.9              | 0.66                   | 0.63              |
| (2000)       | 19                | 18.5              | 0.47                   | 0.48              |

<sup>a</sup> Experimental values observed in both WAXD. <sup>b</sup> The calculated data listed are based on the orthorhombic unit cell with  $a = 10$  nm,  $b = 4.41$  nm,  $c = 0.78$  nm,  $\alpha = \beta = \gamma = 90^\circ$ .

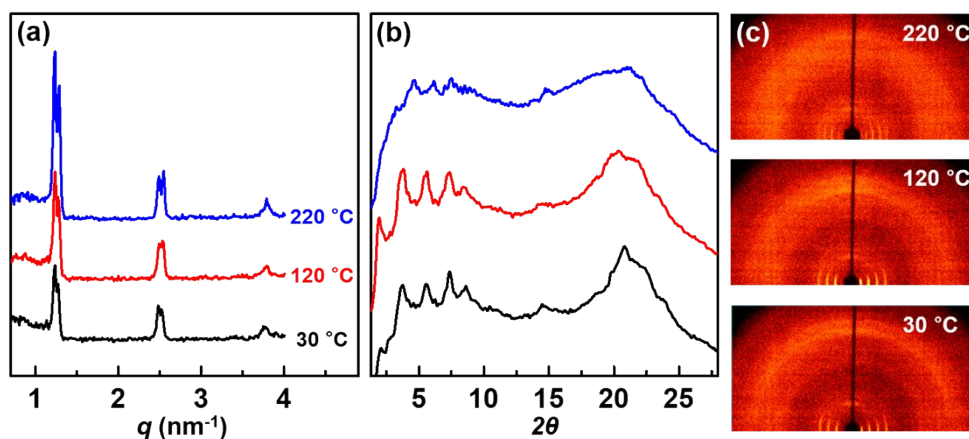

**Fig. S9** Temperature-dependent (a) 1D SAXS, (b) 1D WAXD, and (c) 2D WAXD patterns of BIAZ. Here, the black, red, and blue line represent the status at 30 °C, 120 °C, and 220 °C.

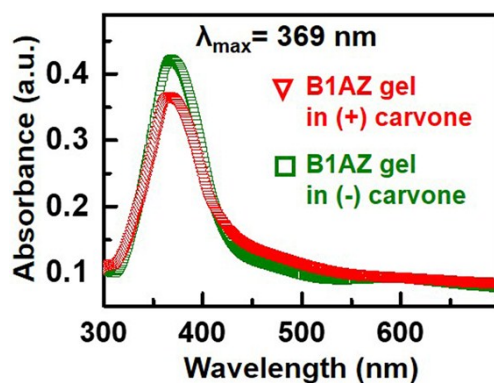

**Fig. S10** UV-vis spectrum of B1AZ gels consisting (+), (-) carvones, respectively.

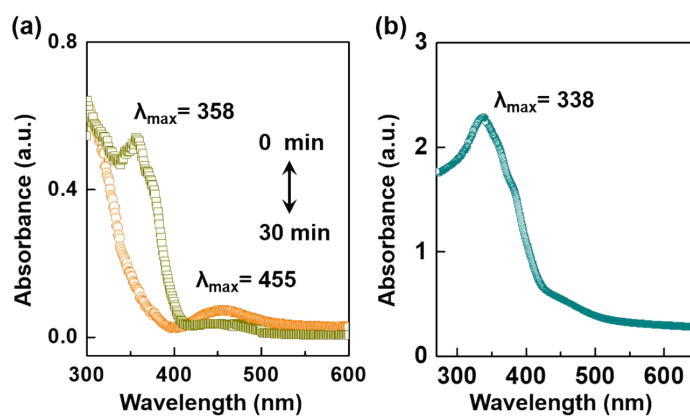

**Fig. S11** UV-vis spectra of achiral B1AZ observed in (a) solution and (b) solid state, respectively. Here, reversible photo-isomerization upon UV (365 nm) and Vis (450 nm) exposure in THF solution are indicated in the Fig. S11(a).

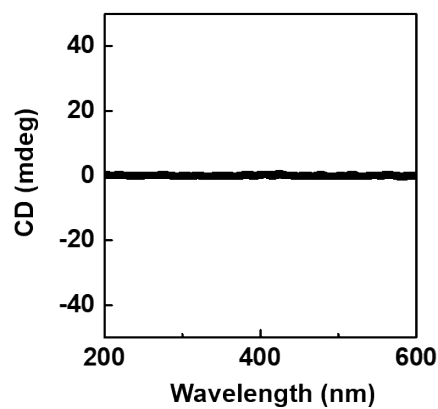

**Fig. S12** CD spectrum of B1AZ powder at room temperature.

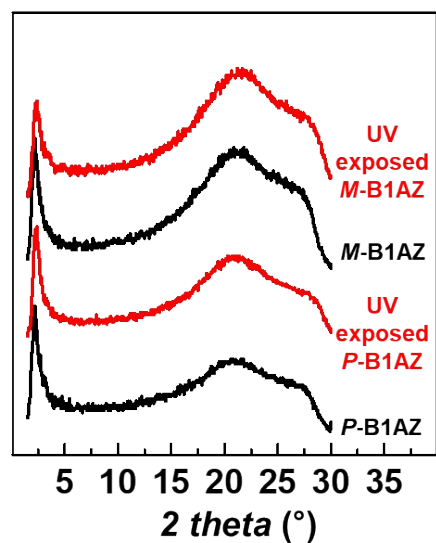

**Fig. S13** (a) 1D WAXD patterns of (*P*), (*M*)-B1AZ and UV-exposed (*P*), (*M*)-B1AZ for 5 h, respectively.

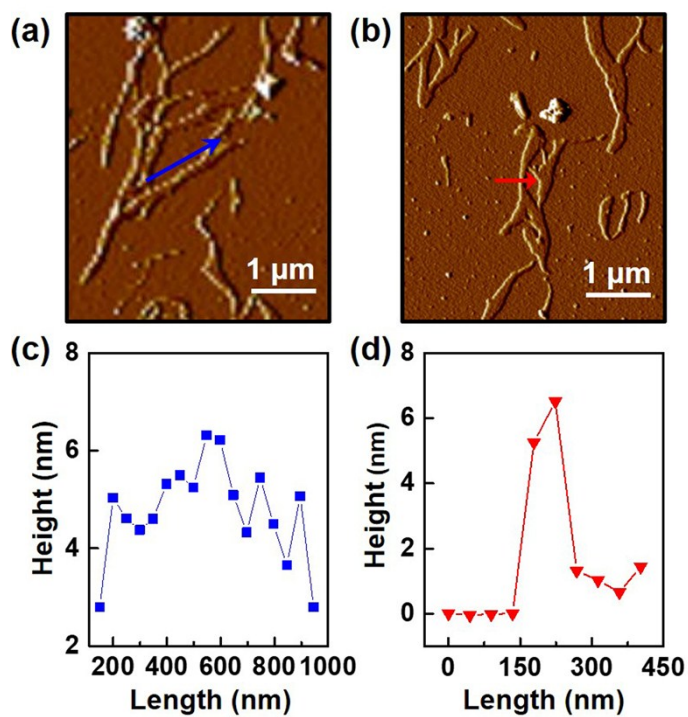

**Fig. S14** (a) 2D AFM image of (*M*)-B1AZ xerogel and (b) subsequently UV exposed image for 5 h. Height profiles along the (c) elongated axis (blue line) and (d) short axis (red line) of helix.



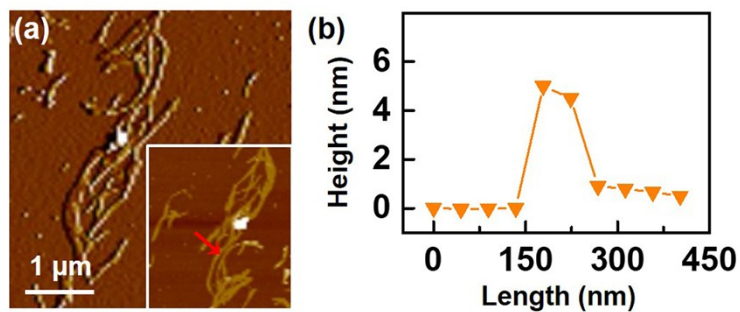

**Fig. S15** (a) AFM image of (*P*)-B1AZ and UV-irradiated image (inset) with (b) that of height profile at room temperature.

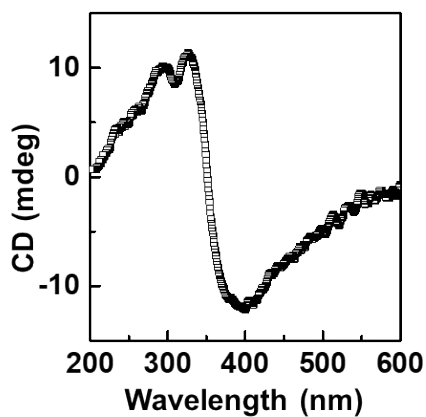

**Fig. S16** CD spectrum of single helix obtained by (*M*)-B1AZ sol state at room temperature.

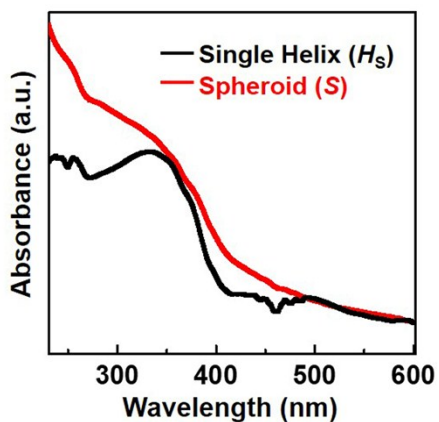

**Fig. S17** UV spectra of single helix and spheroid of (*M*)-B1AZ extracted from the CD measurement at room temperature.

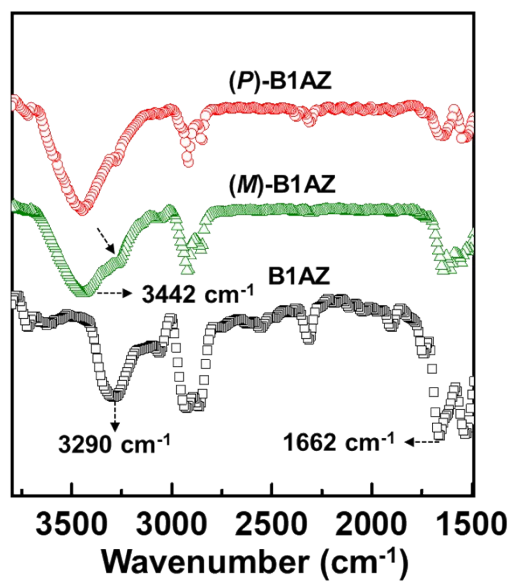

**Fig. S18** FTIR spectra of pristine B1AZ powder, (*M*)-B1AZ, and (*P*) B1AZ at room temperature.
